# Supplementary material for: A review of the electrochemical and galvanic corrosion behavior of important intermetallic compounds in the context of aluminum alloys
Source: Royal Society of Chemistry journal article supplement (doi:10.1039/d4ra06070a), 2024-01-01

Supplementary material

Table 1S

Scheme for intermetallic particles (b) Optical micrographs of 7055 aluminum alloys containing Al and Mg homogenization after heat treatment [67], (c) SEM images of cold rolled Ni<sub>3</sub>Al foils [68], (d) BSE image obtained from annealed Al–8.0Zn–2.0Mg–2.3Cu–0.16Zr alloy showing typical annealed microstructure [68] (e) Tapping mode AFM-SECM images of a template of a metal substrate [69] (f) TEM-BF image of a typical intermetallic particle at a grain boundary for tetragonal DO<sub>23</sub>Al<sub>3</sub>Zr [70]

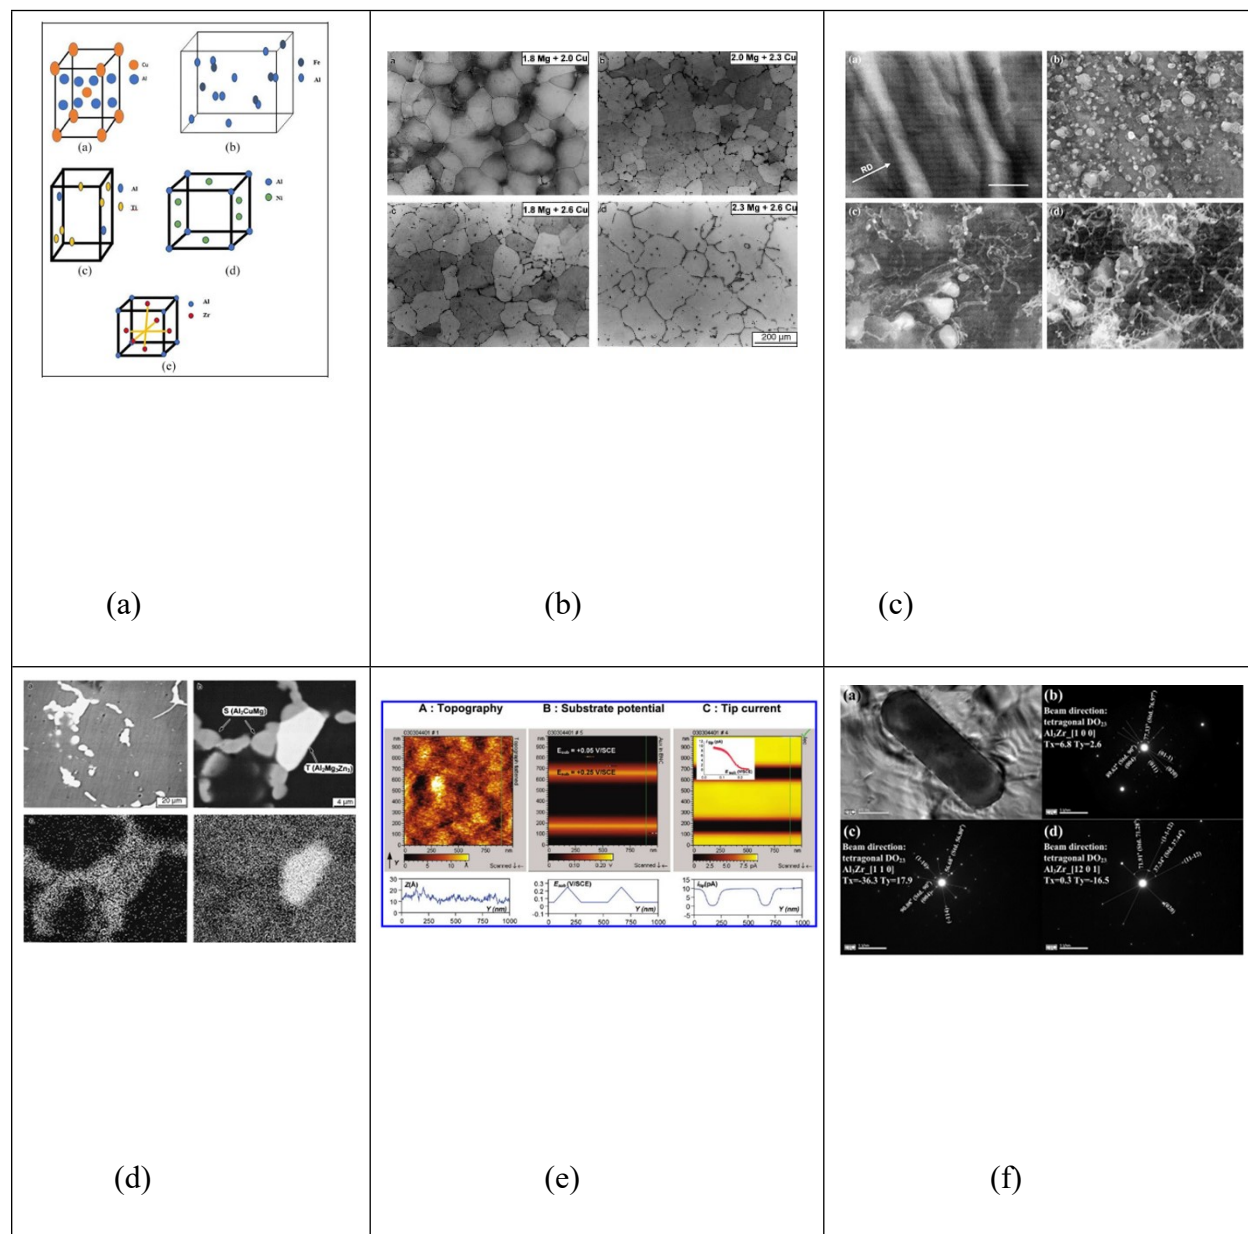

Supplement: d4ra06070a1.pdf [file d4ra06070a1.pdf]
